# Supplementary figures and images for: Physiological correlates of ecological divergence along an urbanization gradient: differential tolerance to ammonia among molecular forms of the malaria mosquito Anopheles gambiae
Source: Springer Nature journal article supplement (doi:10.1186/1472-6785-13-1), 2013-01-07

**(A)**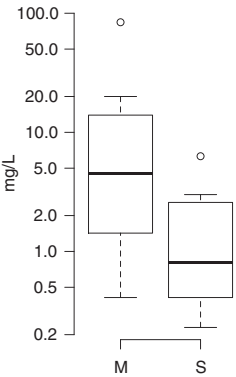**(B)**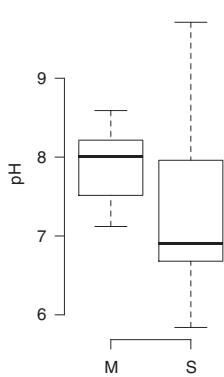**(C)**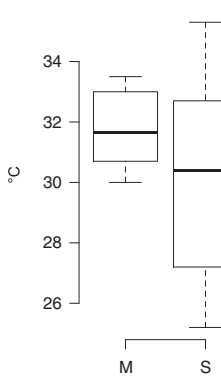

Supplement: 12898_2012_220_MOESM1_ESM.pdf [file 12898_2012_220_MOESM1_ESM.pdf]

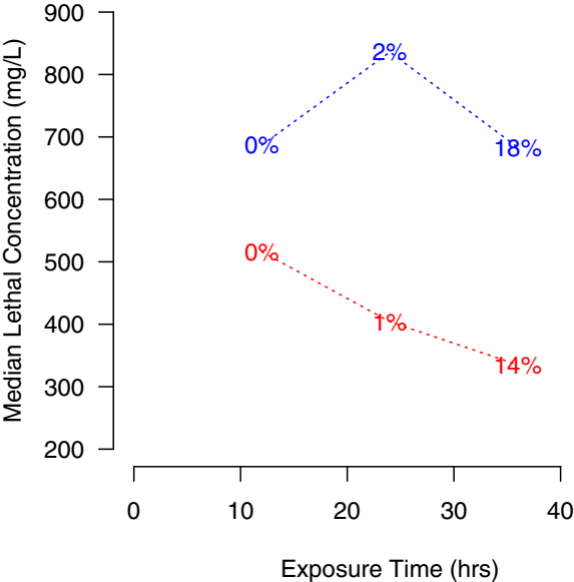

Supplement: 12898_2012_220_MOESM2_ESM.pdf [file 12898_2012_220_MOESM2_ESM.pdf]

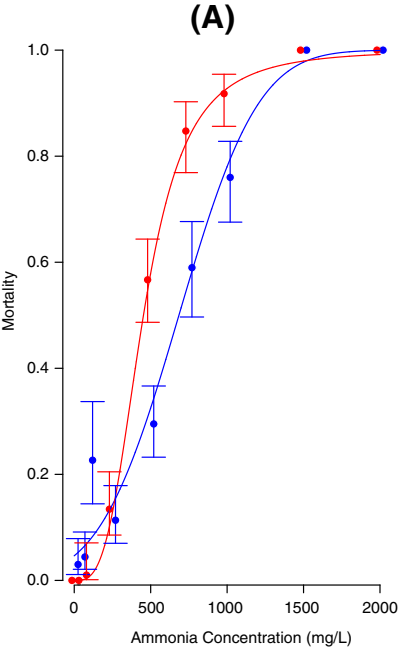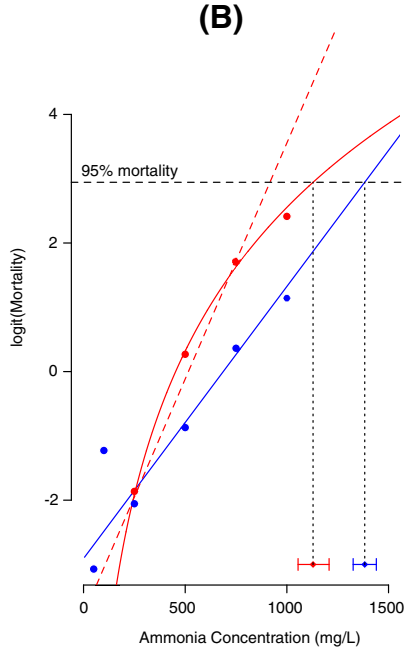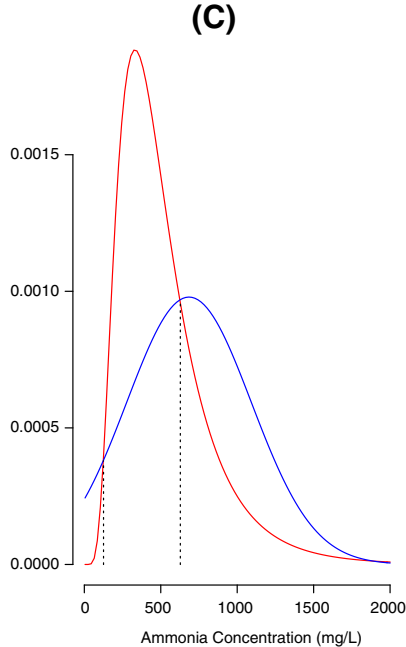

Supplement: 12898_2012_220_MOESM3_ESM.pdf [file 12898_2012_220_MOESM3_ESM.pdf]

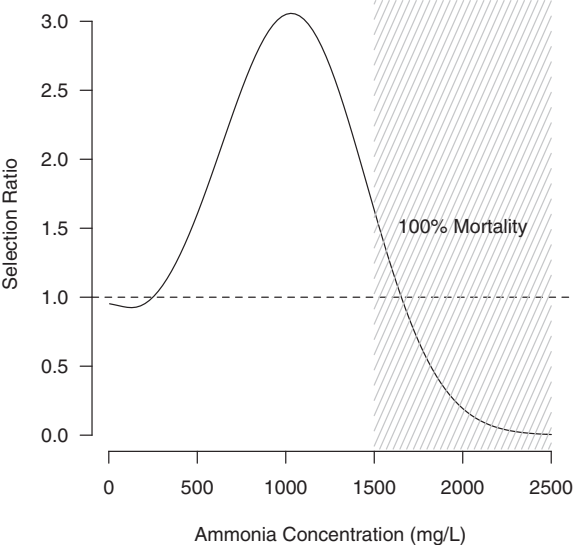

Supplement: 12898_2012_220_MOESM4_ESM.pdf [file 12898_2012_220_MOESM4_ESM.pdf]
